# Supplementary material for: TRAK2, a novel regulator of ABCA1 expression, cholesterol efflux and HDL biogenesis
Source: Oxford University Press journal article supplement (doi:10.1093/eurheartj/ehx315), 2017-05-25
Supplement: eurheartj_38_48_3579_s7.docx [file eurheartj_38_48_3579_s7.docx]

**Supplementary Figures**

**
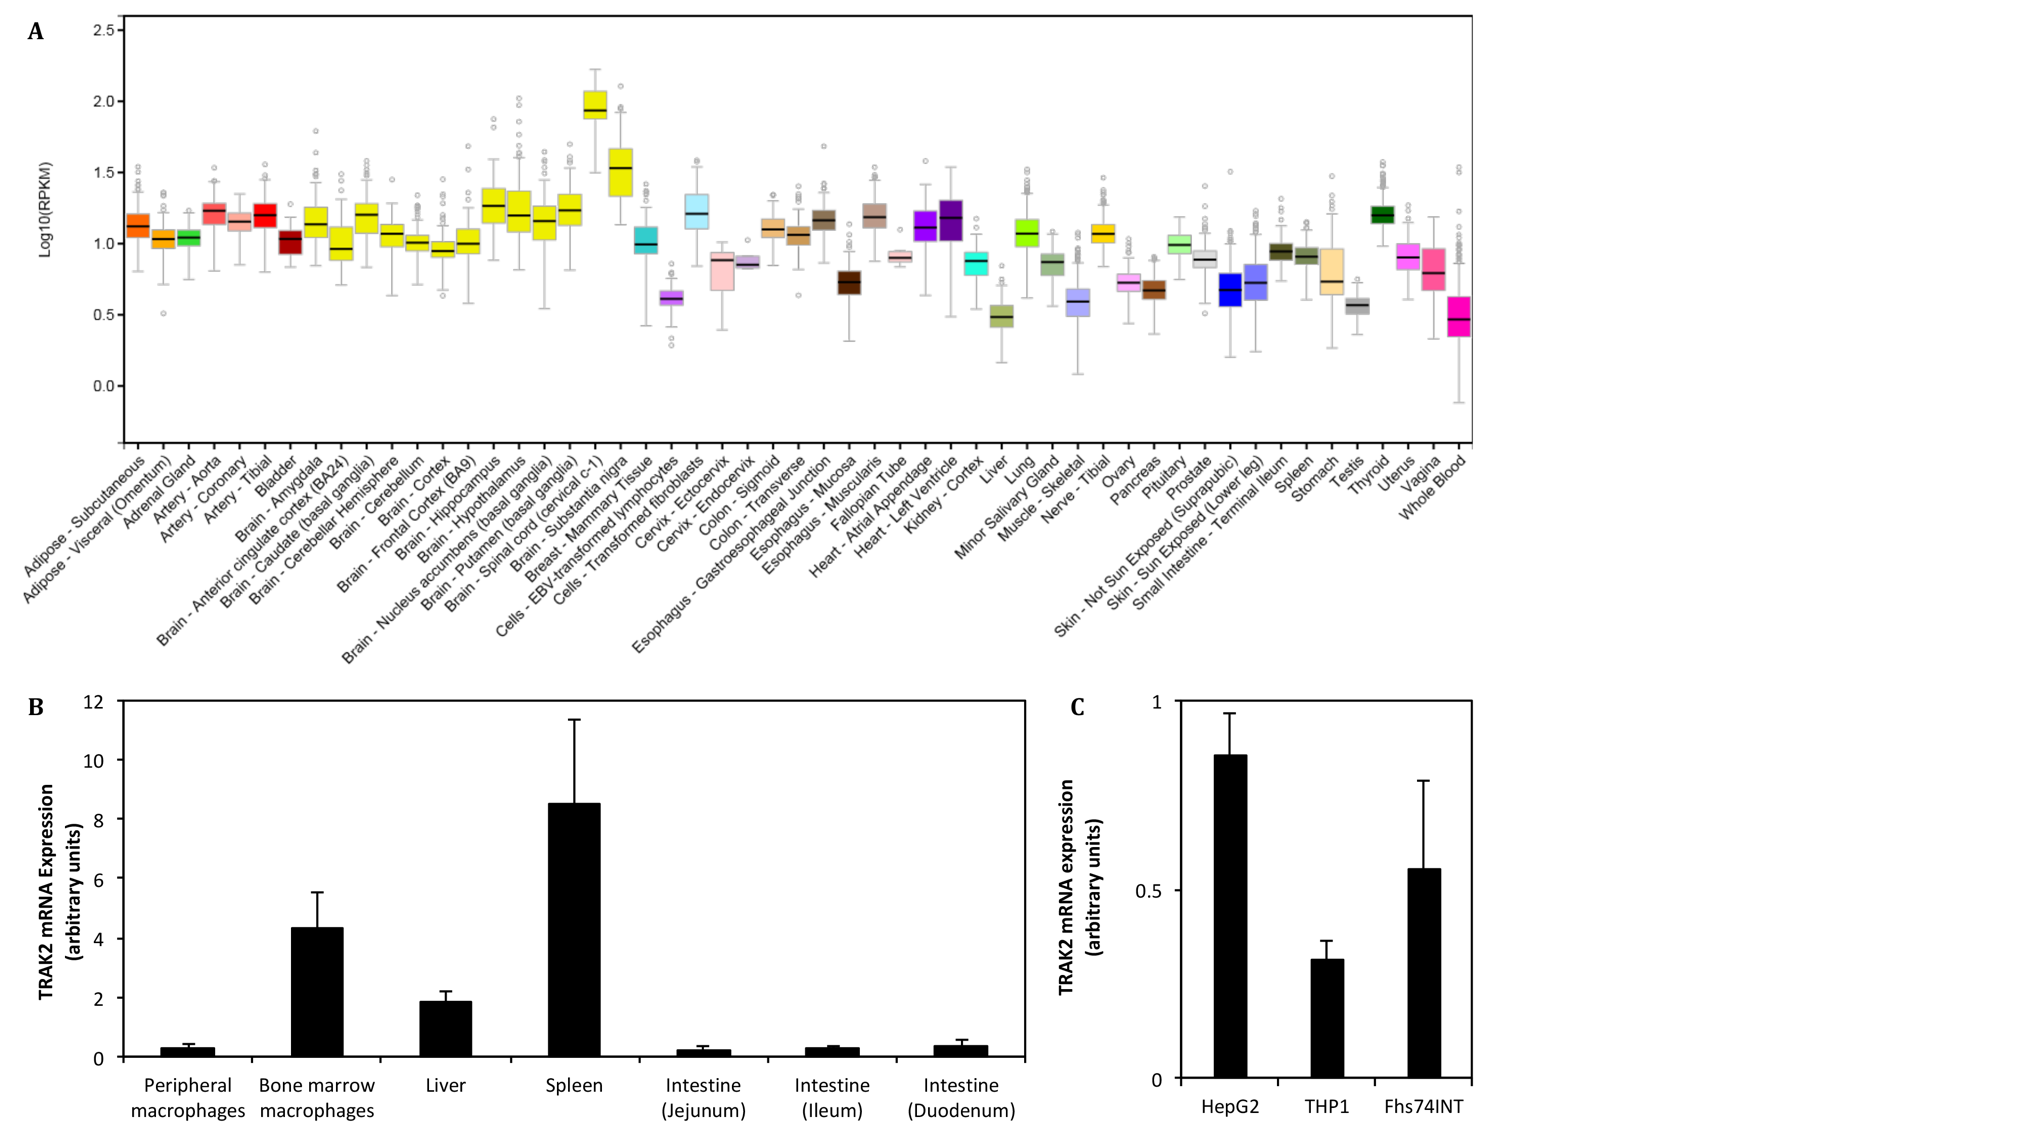
**

**Supplementary Figure 1.** Relative expression of *TRAK2* mRNA in mouse and human tissues. **A**, Relative *TRAK2* mRNA expression across human tissues available from the Genotype-Tissue Expression (GTEx) project (downloaded from http://gtexportal.org/home/gene/TRAK2). The edges of the box depict the 1st and 3rd quartiles, with the dark line within the box representing the median. Points are displayed as outliers if they are above or below 1.5 times the interquartile range. RPKM; Reads Per Kilobase of transcript per Million mapped reads. **B**, Relative *Trak2* mRNA expression across selected tissues from 6 male C57BL/6 mice. Gene expression was normalized to β-actin. Data is represented as the mean ± SD. **C**, Relative *TRAK2* mRNA expression across human HepG2 hepatic cells, THP1 macrophage cells and Fhs74INT intestinal cells. Gene expression was normalized to β-actin. Data is represented as the mean ± SD of 4 independent measurements.

**Supplementary Figure 2.** The effect of TRAK2 siRNA-mediated knockdown on passive and active cholesterol efflux in HepG2 cells**.** In the absence of a cholesterol acceptor there was no significant difference in the total proportion of cholesterol effluxed to the medium between cells transfected with TRAK2 siRNA or non-targeting siRNA control. siRNA-mediated knockdown of TRAK2 in HepG2 cells significantly increased the proportion of cholesterol effluxed to medium containing cholesterol acceptors apoA-I or HDL relative to non-targeting siRNA control. Data is represented as the mean ± SD of 2 independent experiments.

~~
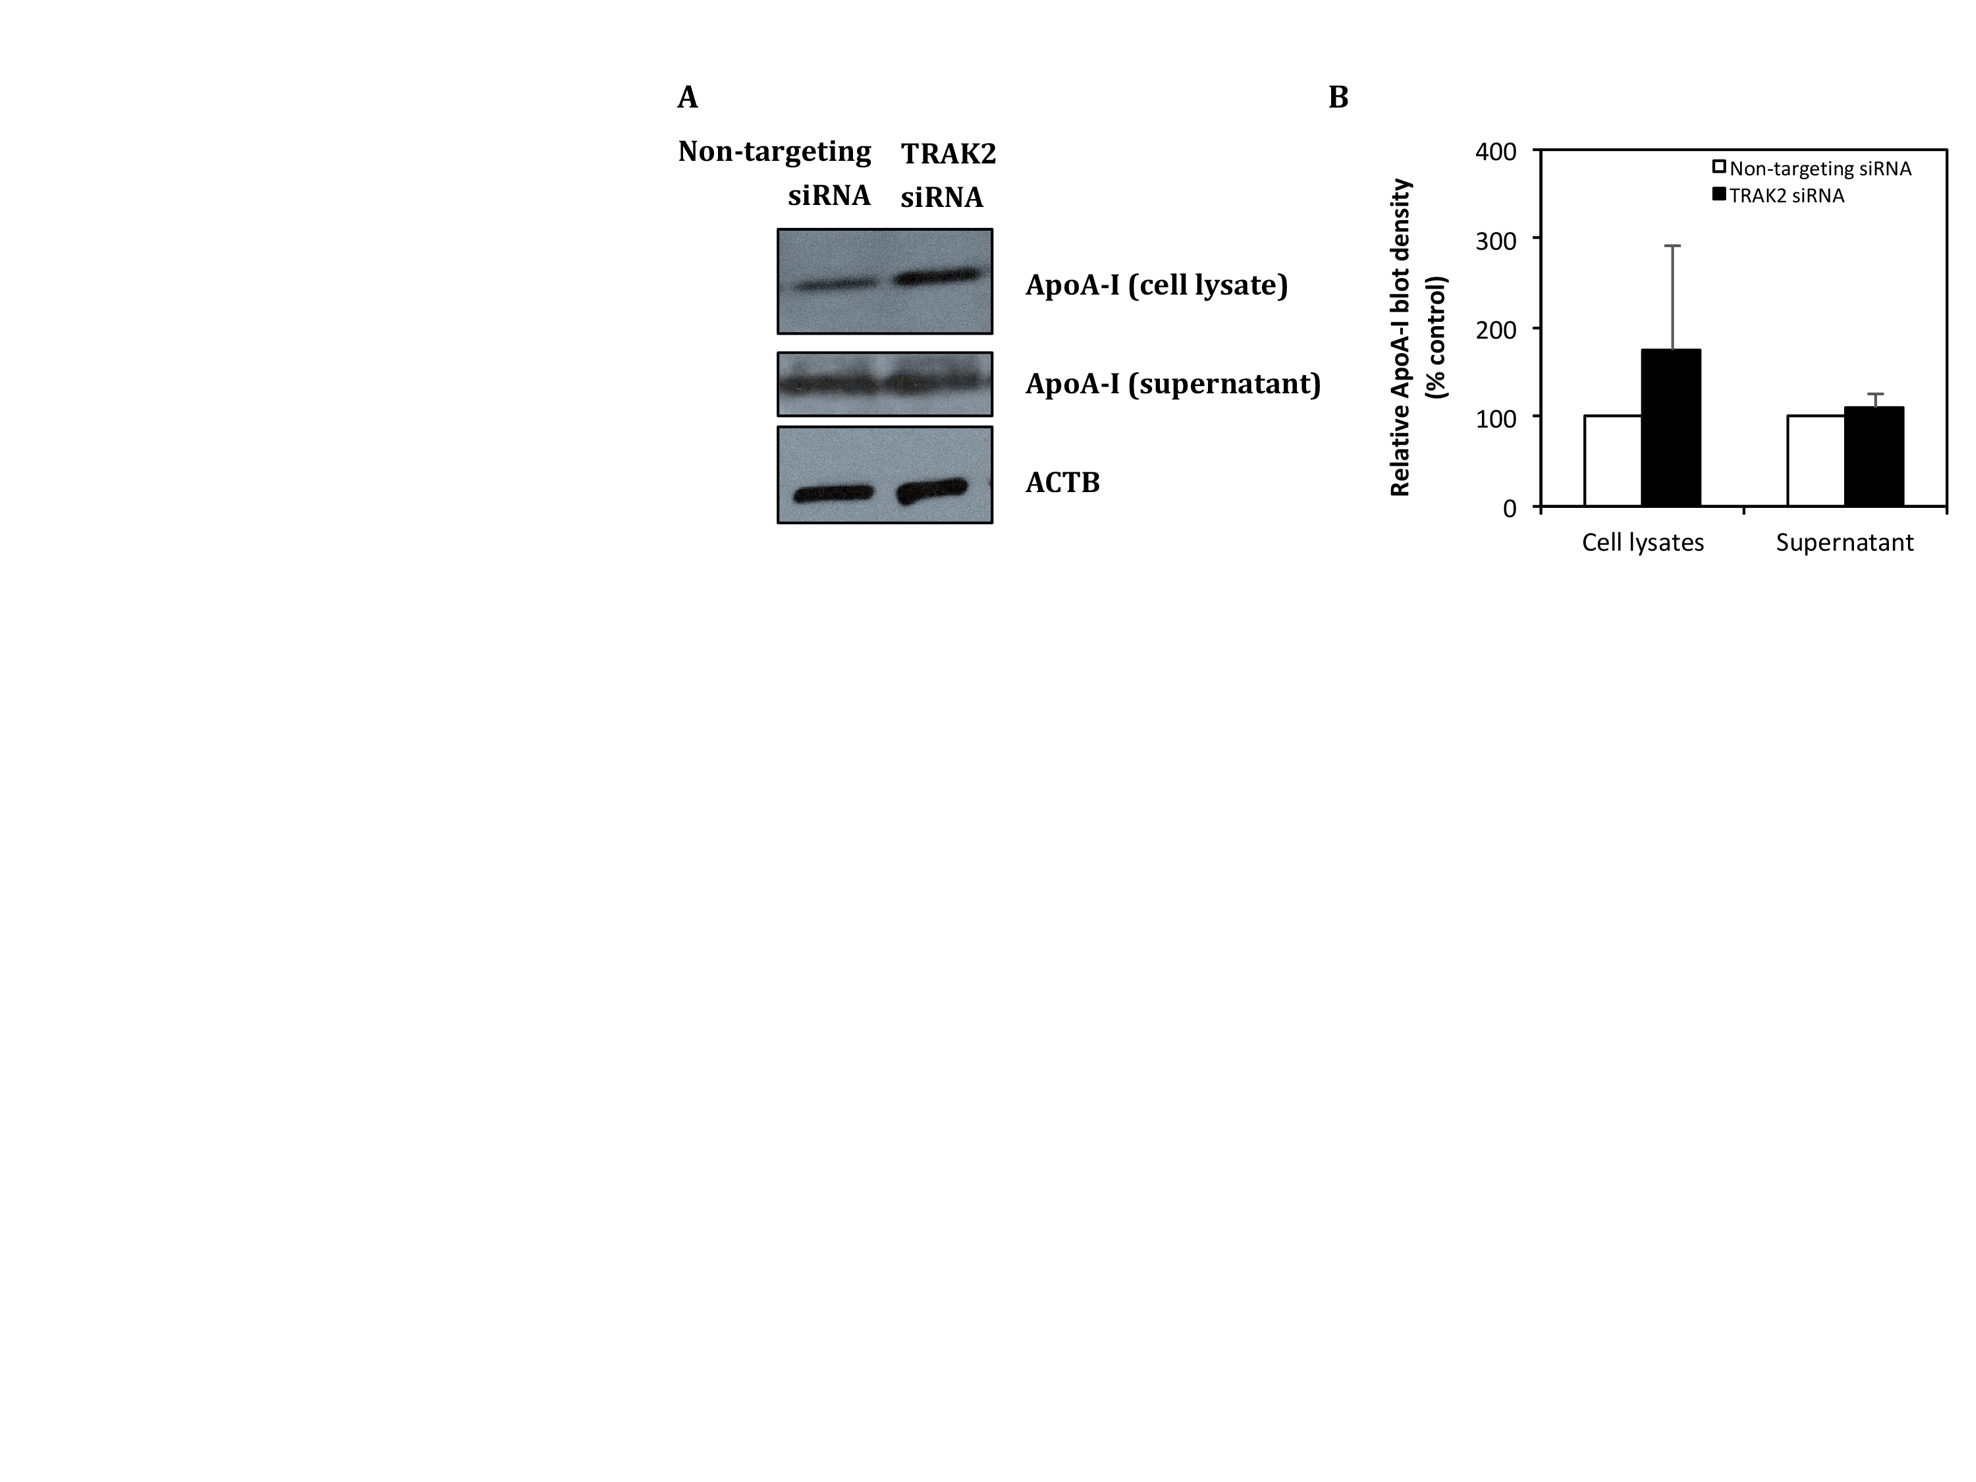
~~

**Supplementary Figure 3.** The effect of siRNA-mediated knockdown of TRAK2 on endogenous apoA-I abundance and secretion in HepG2 cells. **A,** siRNA-mediated knockdown of TRAK2 modestly increased apoA-I abundance and secretion in HepG2 cells. **B,** TRAK2 knockdown trended to increase apoA-I protein levels in cell lysates and in supernatant relative to controls, as quantitated by Image J software. Data is represented as the mean ± SD of 4 independent experiments.

**
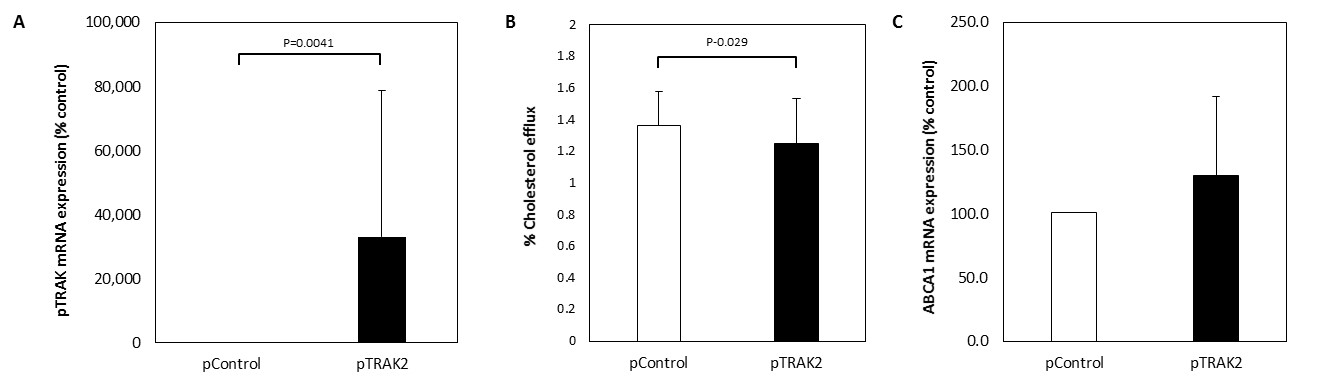
**

**Supplementary Figure 4.** The effect of TRAK2 over-expression on plasmid *TRAK2* expression and cholesterol efflux in HepG2 cells**. A**, Transfection of plasmid DNA encoding *TRAK2* (pTRAK2) significantly increased the mRNA expression of *TRAK2* relative to empty plasmid (pControl). Data is represented as the mean ± SD of 2 independent experiments. **B**, TRAK2 over-expression modestly but significantly decreased cholesterol efflux relative to control. Data is represented as the mean ± SD of 4 independent experiments. **C**, TRAK2 over-expression had no significant effect on ABCA1 expression. Data is represented as the mean ± SD of 2 independent experiments.

**
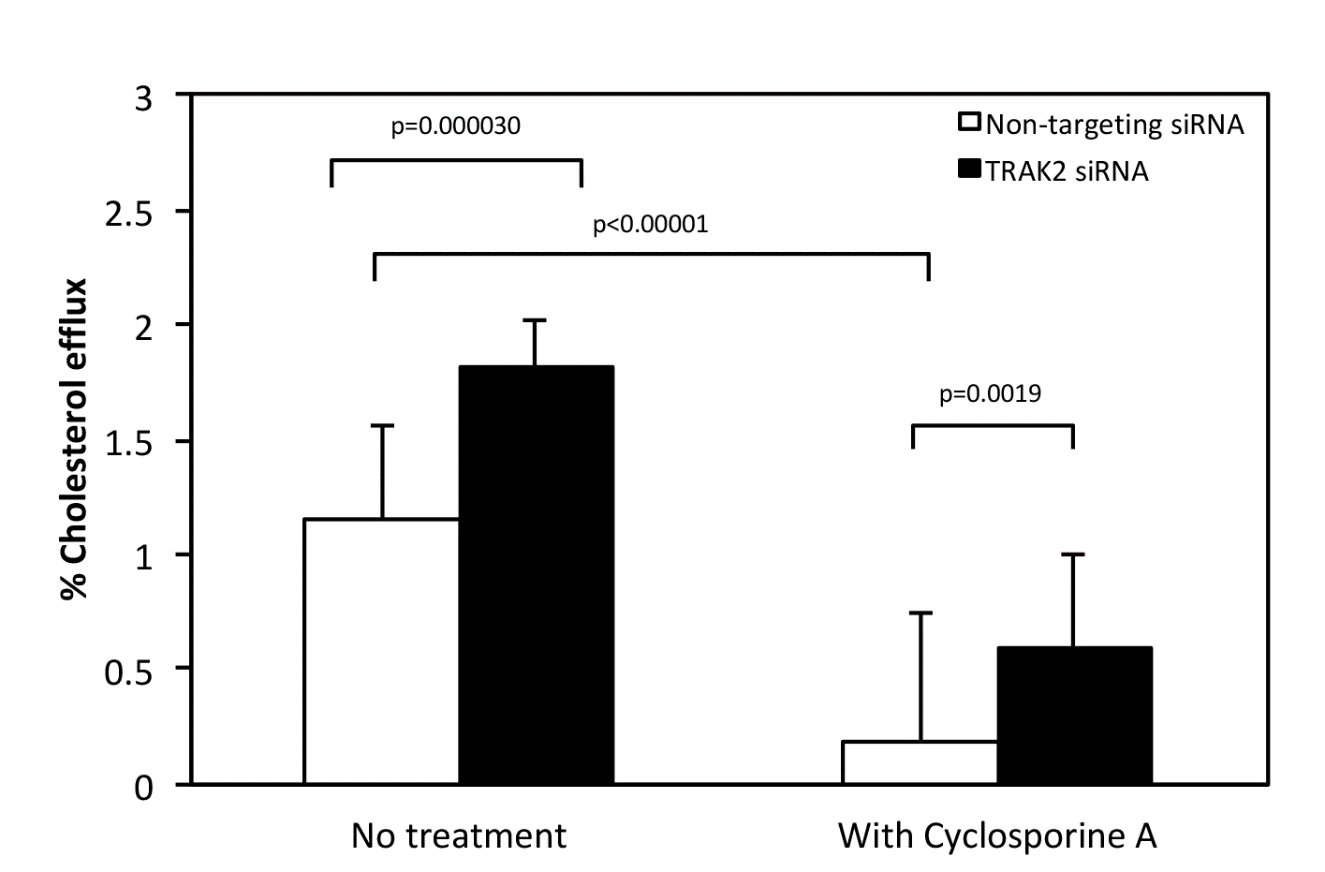
**

**Supplementary Figure 5.** The effect of a 3 hour Cyclosporine A treatment on cholesterol efflux. TRAK2 siRNA treatment significantly increased cholesterol efflux to apoA-I relative to non-targeting siRNA control. A 3 hour Cyclosporine A treatment suppressed cholesterol efflux to apoA-I in HepG2 cells. Data is represented as the mean ± SD of 3 independent experiments.

**
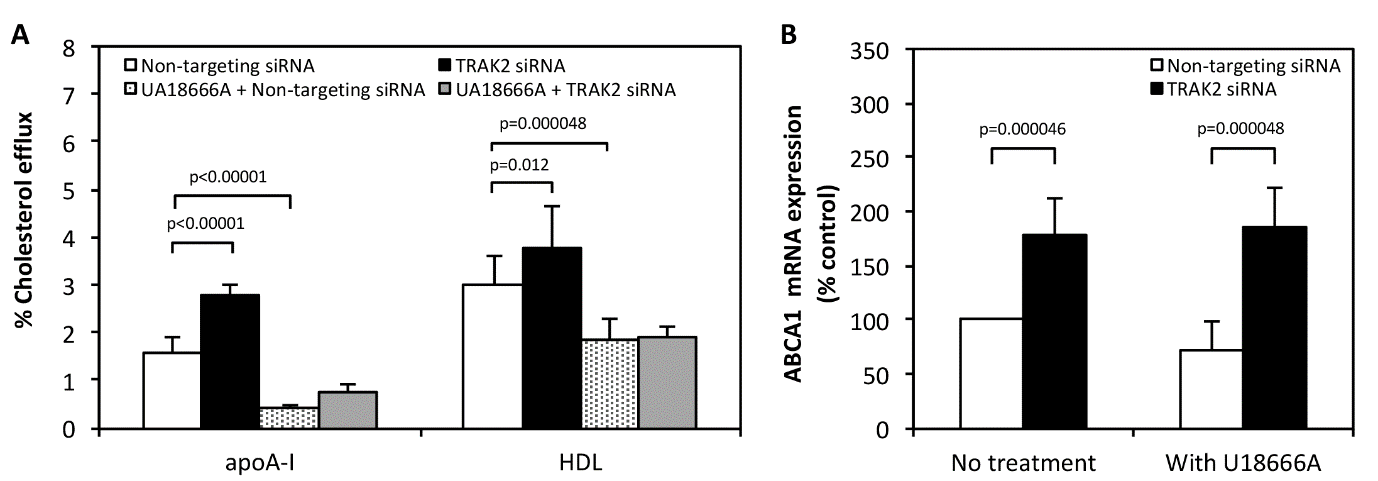
**

**Supplementary Figure 6.** The effect of U18666A treatment on cholesterol efflux in HepG2 cells transfected with siRNA. **A**, U18666A treatment reduced cholesterol efflux to apoA-I and HDL in HepG2 cells transfected with non-targeting siRNA. TRAK2 siRNA treatment significantly increased cholesterol efflux to apoA-I and HDL relative to non-targeting siRNA control. ApoA-I efflux data is represented as the mean ± SD of 3 independent experiments. HDL efflux data is represented as the mean ± SD of 2 independent experiments. **B**, TRAK2 knockdown significantly increased the expression of ABCA1 by 150% in cells treated with U18666A, and by 80% in cells without treatment. Data is represented as the mean ± SD of 4 independent experiments.

**
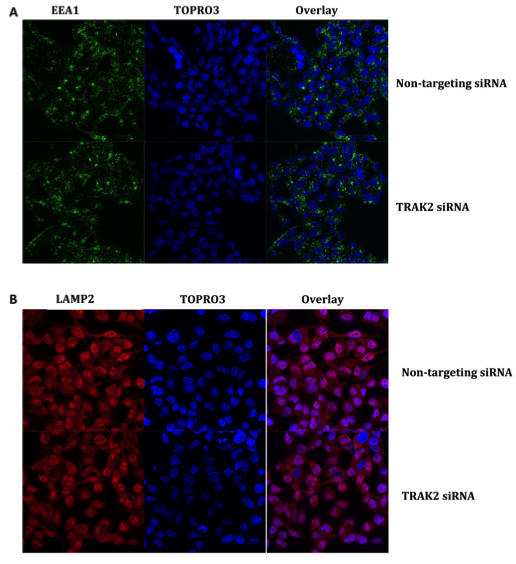
**

**Supplementary Figure 7.** The effect of siRNA-mediated TRAK2 knockdown on immunofluorescence staining of early and late endosomes in HepG2 cells.Immunofluorescence confocal microscopy was used to observe the abundance and localization of early and late endosomes in HepG2 cells. Cells grown on cover slips were immunostained with early endosome marker EEA1 (A) or late endosome marker LAMP2 (B) 72 hours after transfection. siRNA-mediated gene knockdown of TRAK2 had no marked effect on EEA1 or LAMP2 localization or intensity relative to non-targeting siRNA control. TO-PRO-3 iodide was used to visualize the nucleus.

**
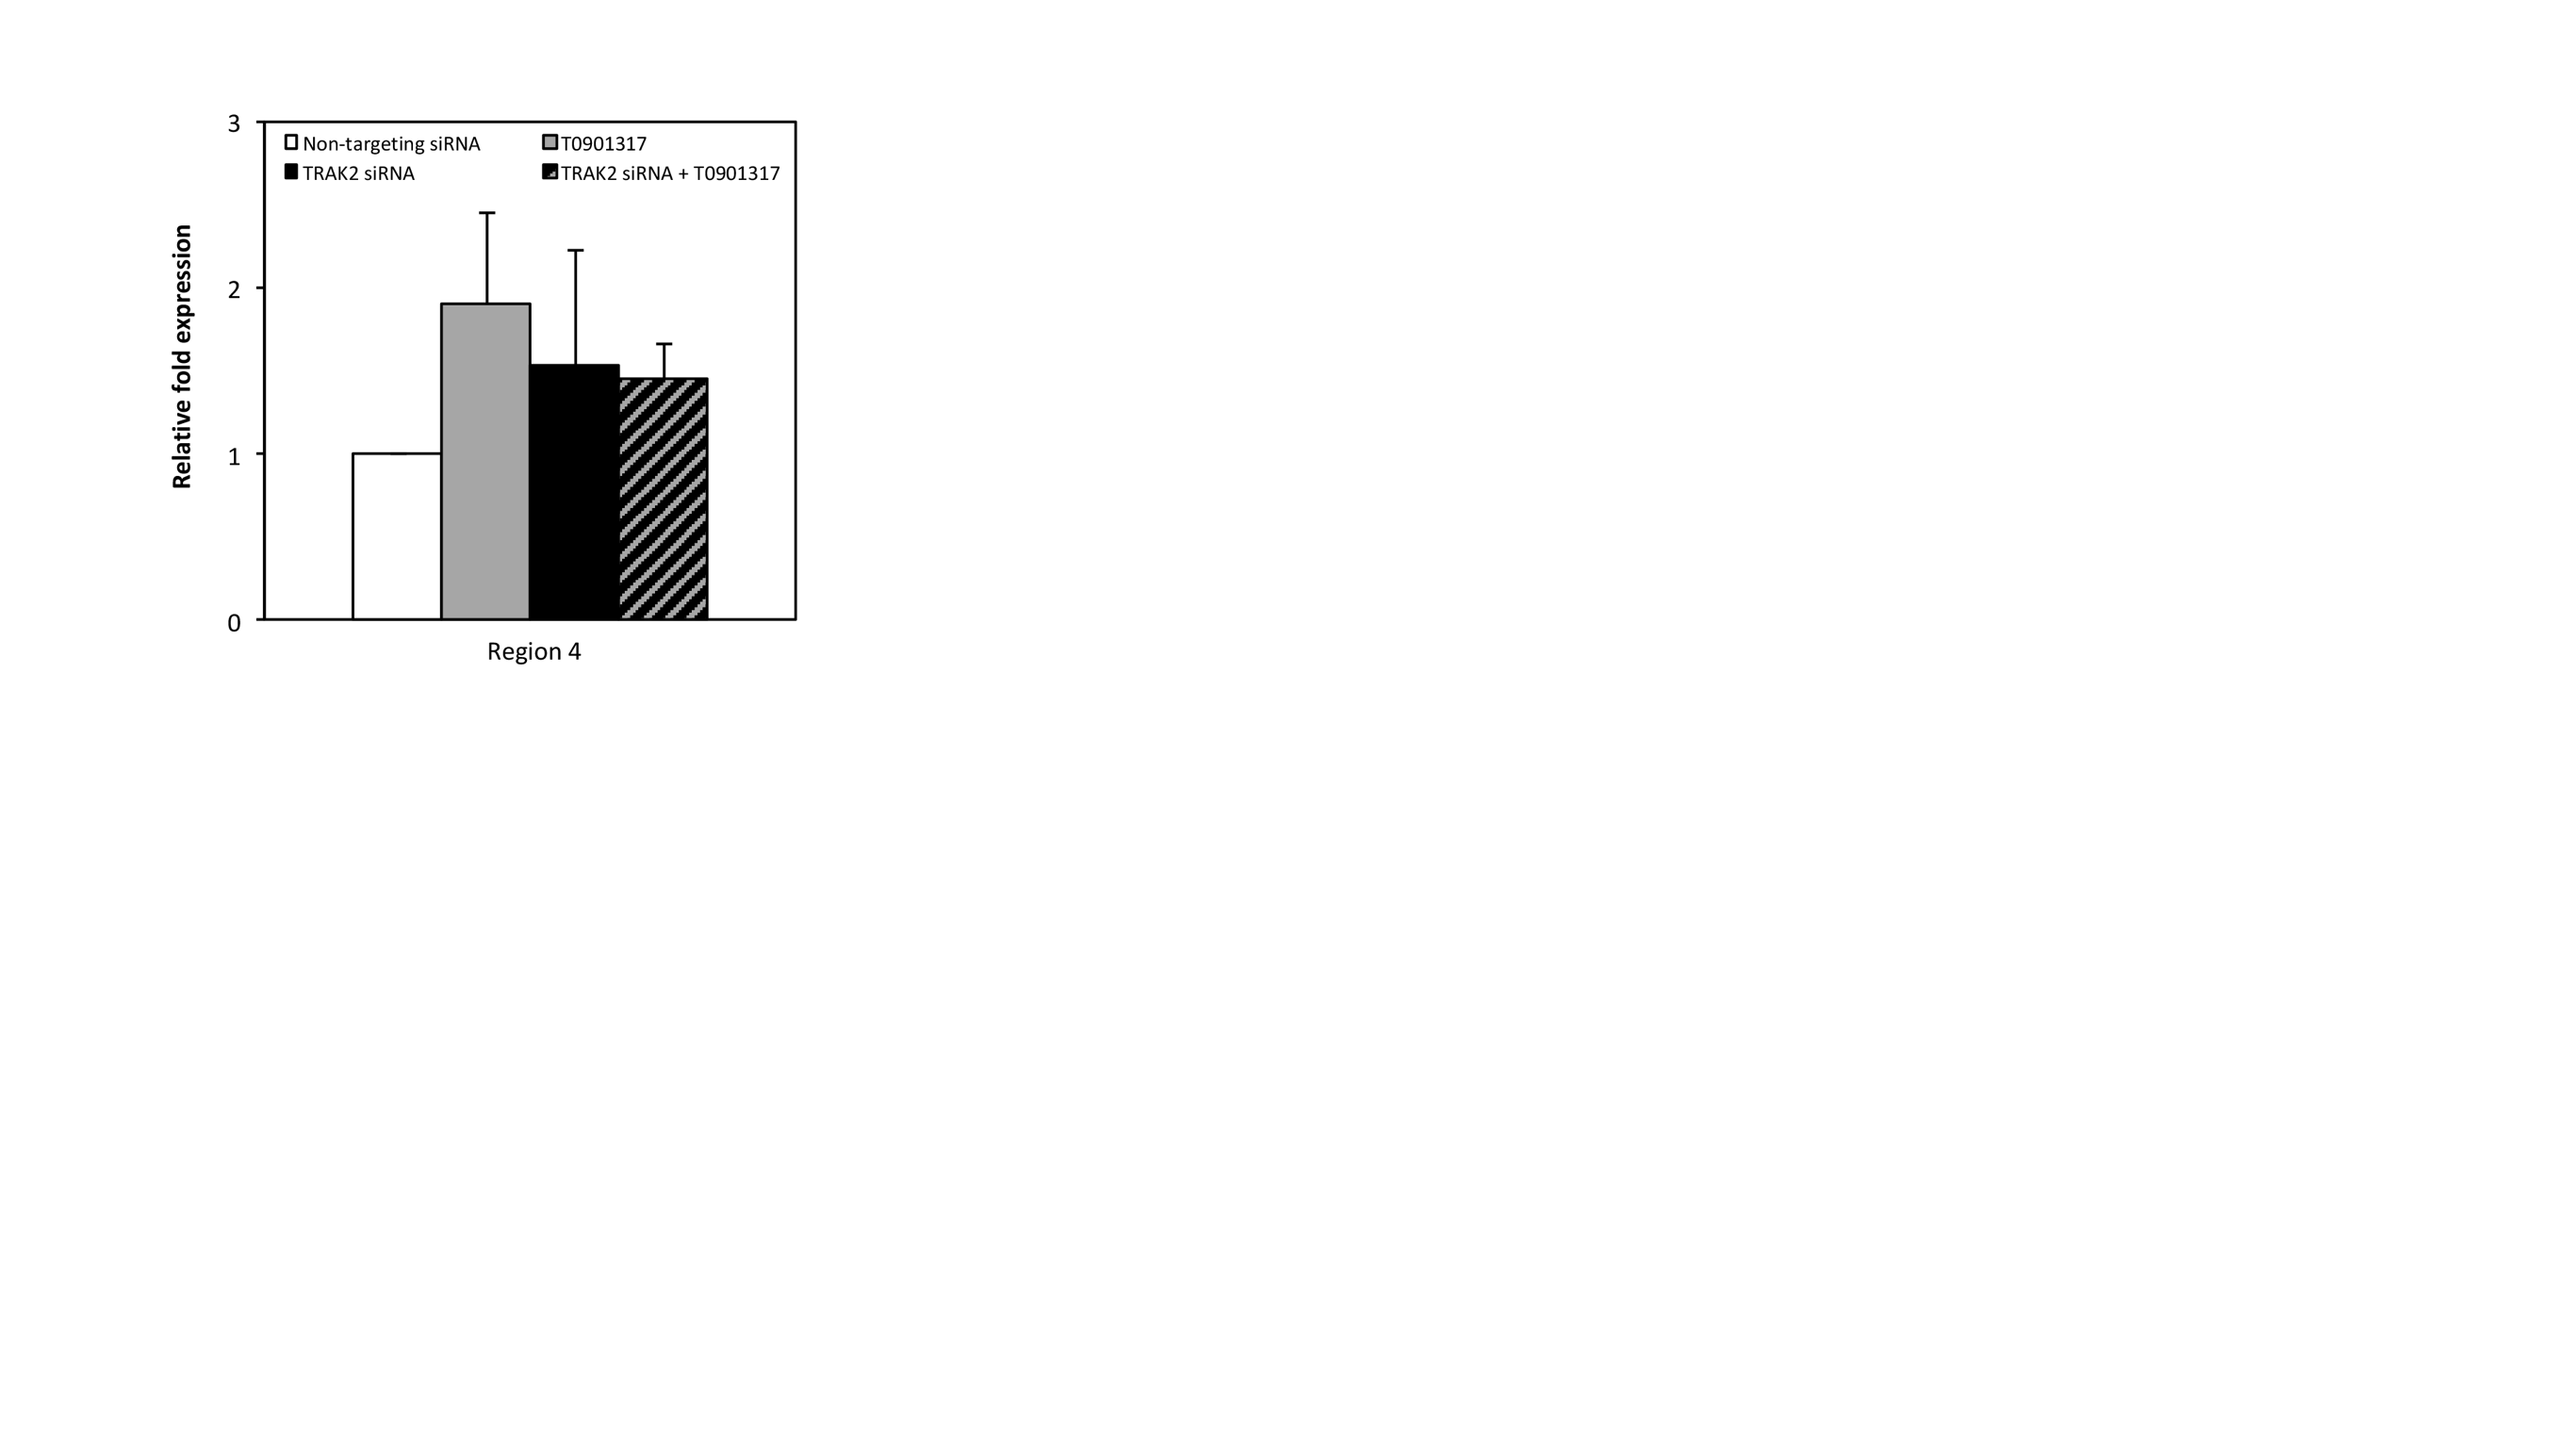
**

**Supplementary Figure 8.** The effect ofTRAK2 siRNA-mediated knockdown on LXR-α binding to LXR-α response element Region 4 within the *ABCA1* promoter. TRAK2 knockdown had no significant effect on LXR-α binding to LXR-α response element Region 4 within the *ABCA1* promoter relative to non-targeting siRNA control. Data is represented as the mean ± SD of 2 independent experiments.

**
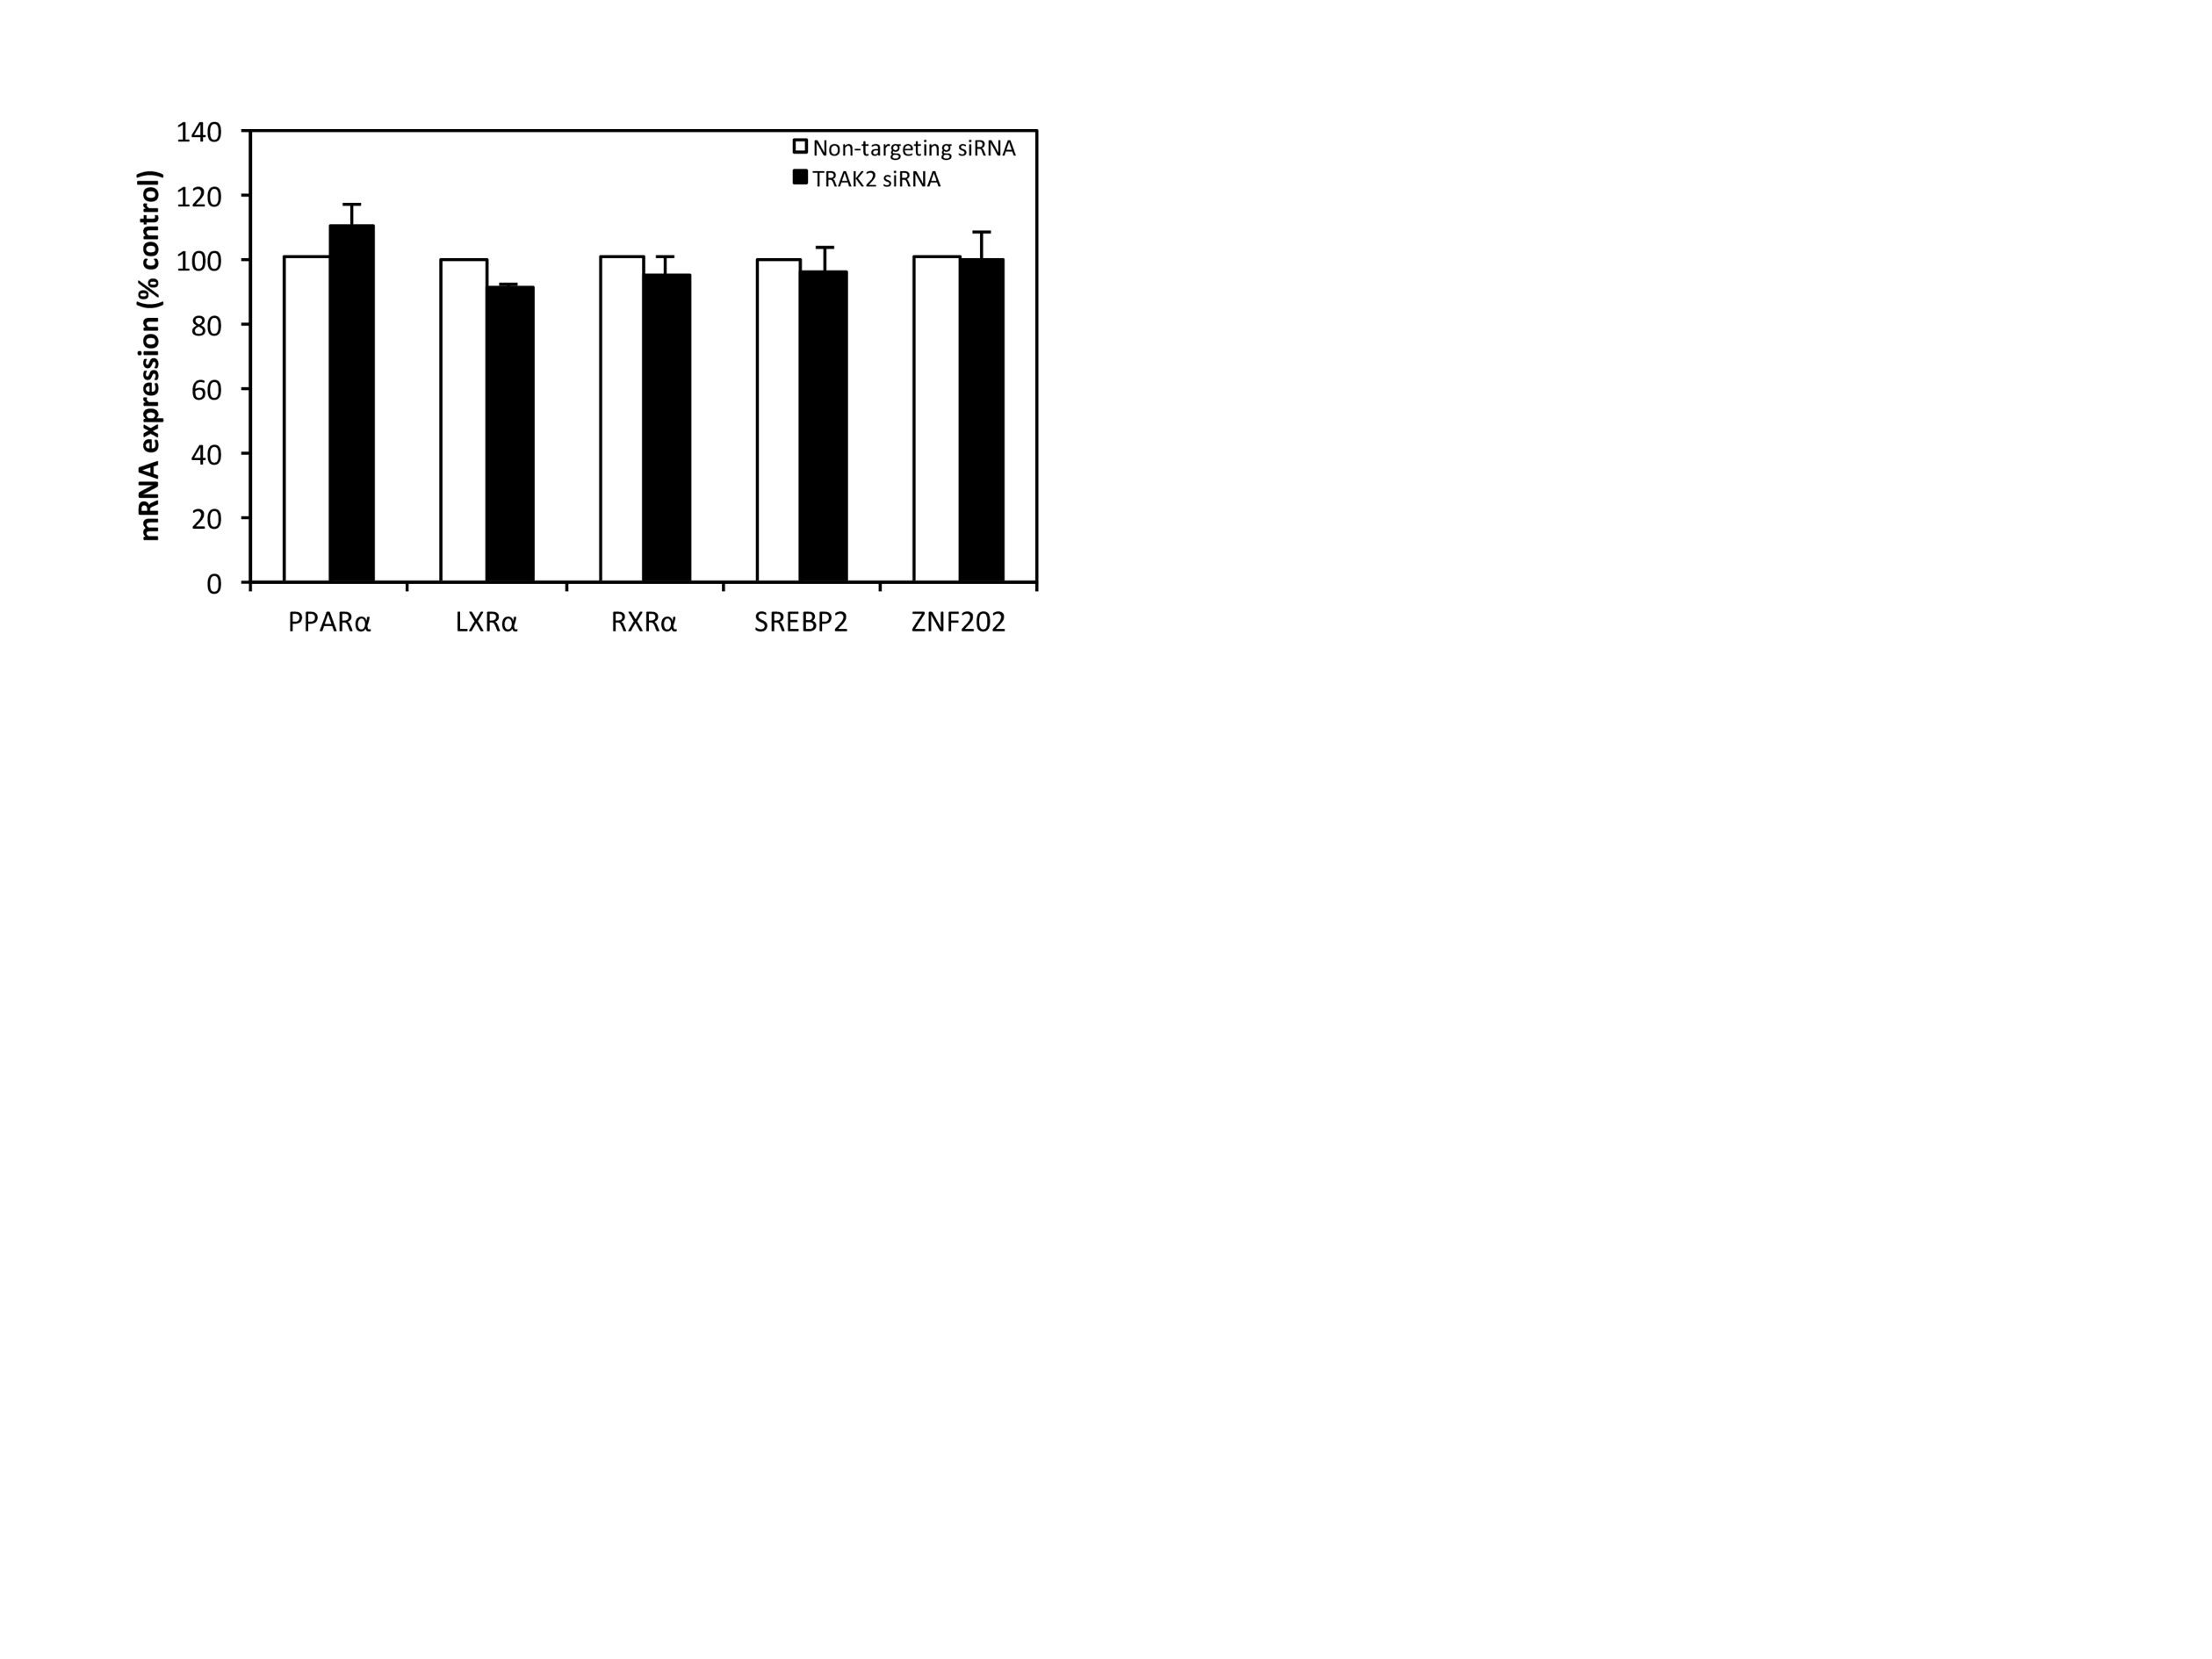
**

**Supplementary Figure 9.** The effect of TRAK2 siRNA-mediated knockdown on the mRNA expression of regulators of *ABCA1* transcription in HepG2 cells. TRAK2 knockdown had no significant effect on the expression levels of *PPARα, LXRα, RXRα, SREBP2* and *ZNF202* relative to non-targeting siRNA control in HepG2 cells. Gene expression was normalized to β-actin. Data is represented as the mean ± SD of 2 independent experiments.
